# Supplementary material for: Targeting CREB3L2-mediated lipid metabolism overcomes lenvatinib resistance and attenuates the progression of hepatocellular carcinoma
Source: Research Square preprint supplement (doi:10.21203/rs.3.rs-6284026/v1), 2025-04-21
Supplement: Supplementary file 1 [file 953fd37c8bd8ac7cf29db3b4.pdf]

**Supplemental Table-1 Relationships between CREB3L2 and clinicopathological characteristics in the Zhongshan cohort**

| Variables       | Total<br>(n=176) | CREB3L2 low<br>(n=82) | CREB3L2 high<br>(n=94) | $\chi^2$ | <i>P</i> |
|-----------------|------------------|-----------------------|------------------------|----------|----------|
| Age             |                  |                       |                        | 1.200    | 0.273    |
| ≤50             | 76(43.2)         | 39                    | 37                     |          |          |
| >50             | 100(56.8)        | 43                    | 57                     |          |          |
| AFP             |                  |                       |                        | 1.354    | 0.245    |
| ≤20             | 65(36.9)         | 34                    | 31                     |          |          |
| >20             | 111(63.1)        | 48                    | 63                     |          |          |
| CEA             |                  |                       |                        | 0.085    | 0.770    |
| ≤5              | 162(92.0)        | 76                    | 86                     |          |          |
| >5              | 14(8.0)          | 6                     | 8                      |          |          |
| CA199           |                  |                       |                        | 0.743    | 0.389    |
| ≤36             | 134(76.1)        | 60                    | 74                     |          |          |
| >36             | 42(23.9)         | 22                    | 20                     |          |          |
| Cirrhosis       |                  |                       |                        | 0.368    | 0.544    |
| No              | 29(16.5)         | 15                    | 14                     |          |          |
| Yes             | 147(83.5)        | 67                    | 80                     |          |          |
| Tumor size      |                  |                       |                        |          |          |
| ≤5              | 85(48.3)         | 40                    | 45                     | 0.014    | 0.904    |
| >5              | 91(51.7)         | 42                    | 49                     |          |          |
| Differentiation |                  |                       |                        |          |          |
| I/II            | 111(63.1)        | 43                    | 68                     | 7.447    | 0.006    |
| III/IV          | 65(36.9)         | 39                    | 26                     |          |          |
| Child grade     |                  |                       |                        |          |          |
| A               | 166(94.3)        | 77                    | 89                     | 0.050    | 0.804    |
| B/C             | 10(5.7)          | 5                     | 5                      |          |          |
| MVI             |                  |                       |                        |          |          |
| Negative        | 100(56.8)        | 43                    | 57                     | 1.200    | 0.273    |
| Positive        | 76(43.2)         | 39                    | 37                     |          |          |
| BCLC stage      |                  |                       |                        |          |          |
| 0/A             | 87(49.4)         | 48                    | 39                     | 5.092    | 0.024    |
| B/C             | 89(50.6)         | 34                    | 55                     |          |          |
| ALT             |                  |                       |                        |          |          |
| ≤40             | 102(58.0)        | 50                    | 52                     | 0.545    | 0.448    |
| >40             | 74(42.0)         | 32                    | 42                     |          |          |
| AST             |                  |                       |                        |          |          |
| ≤37             | 124(70.5)        | 62                    | 62                     | 1.686    | 0.194    |
| >37             | 52(29.5)         | 20                    | 32                     |          |          |

Figure legends

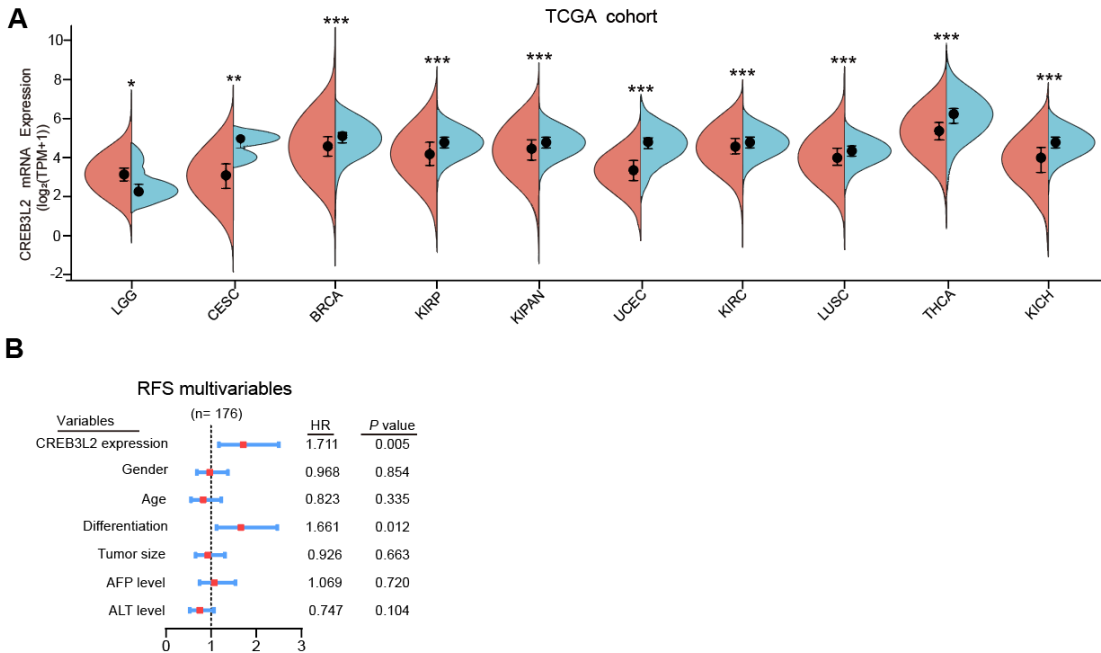

**Figure S1 CREB3L2 is upregulated and correlates with poor prognosis in HCC.**

**(A)**Relative expression of CREB3L2 in brain Lower Grade Glioma(LGG), cervical squamous cell carcinoma and endocervical adenocarcinoma(CESC), breast invasive carcinoma(BRCA), kidney renal papillary cell carcinoma(KIRP), pan-kidney cohort (KIPAN), uterine Corpus Endometrial Carcinoma(UCEC), kidney renal clear cell carcinoma(KIRC), lung squamous cell carcinoma(LUSC), thyroid carcinoma(THCA), kidney Chromophobe(KICH).**(B)** Multivariable Cox analysis of clinical prognostic parameters for RFS. \*, $P < 0.05$ ; \*\*,  $P < 0.01$ ; \*\*\*,  $P < 0.001$ .

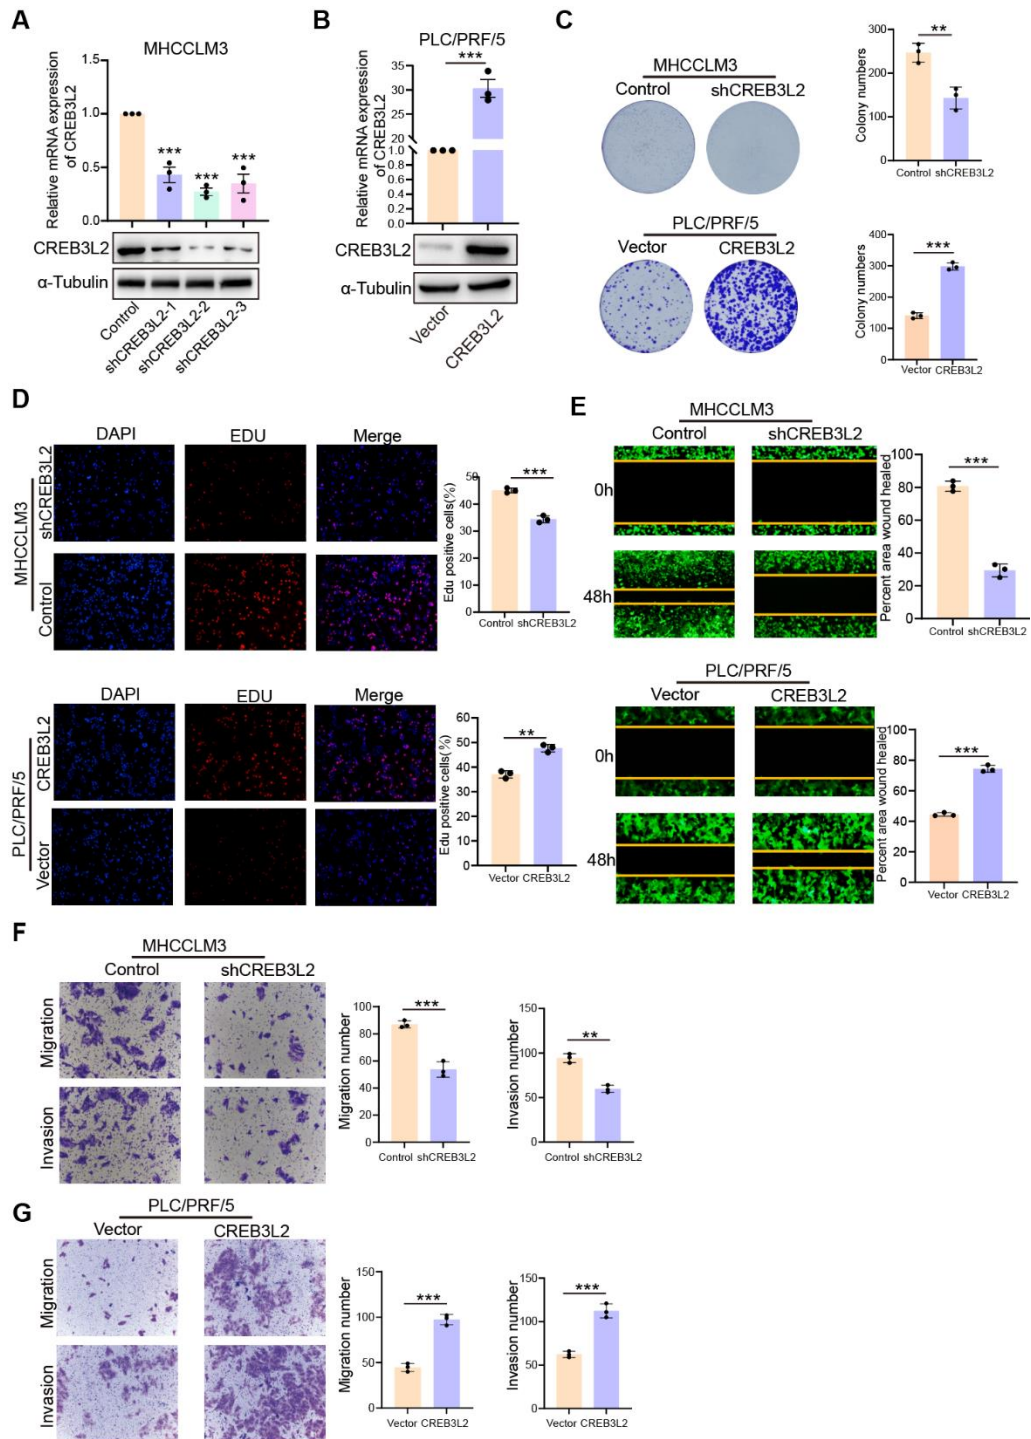

**FigureS2 CREB3L2 facilitates HCC cell proliferation and metastasis in vitro**

The transfection efficiency of knockdown and overexpression of CREB3L2 in LM3 and PLC cells was confirmed through qPCR (A) and Western blotting (B). (C-D) Colony formation and EDU assays were performed after CREB3L2 was knocked down or overexpressed in LM3 and PLC cells. (E-G) After knockdown or overexpression of CREB3L2, the migration and invasion capabilities of HCC cells were assessed using scratch and transwell assays. \*,  $P < 0.05$ ; \*\*,  $P < 0.01$ ; \*\*\*,  $P < 0.001$ .

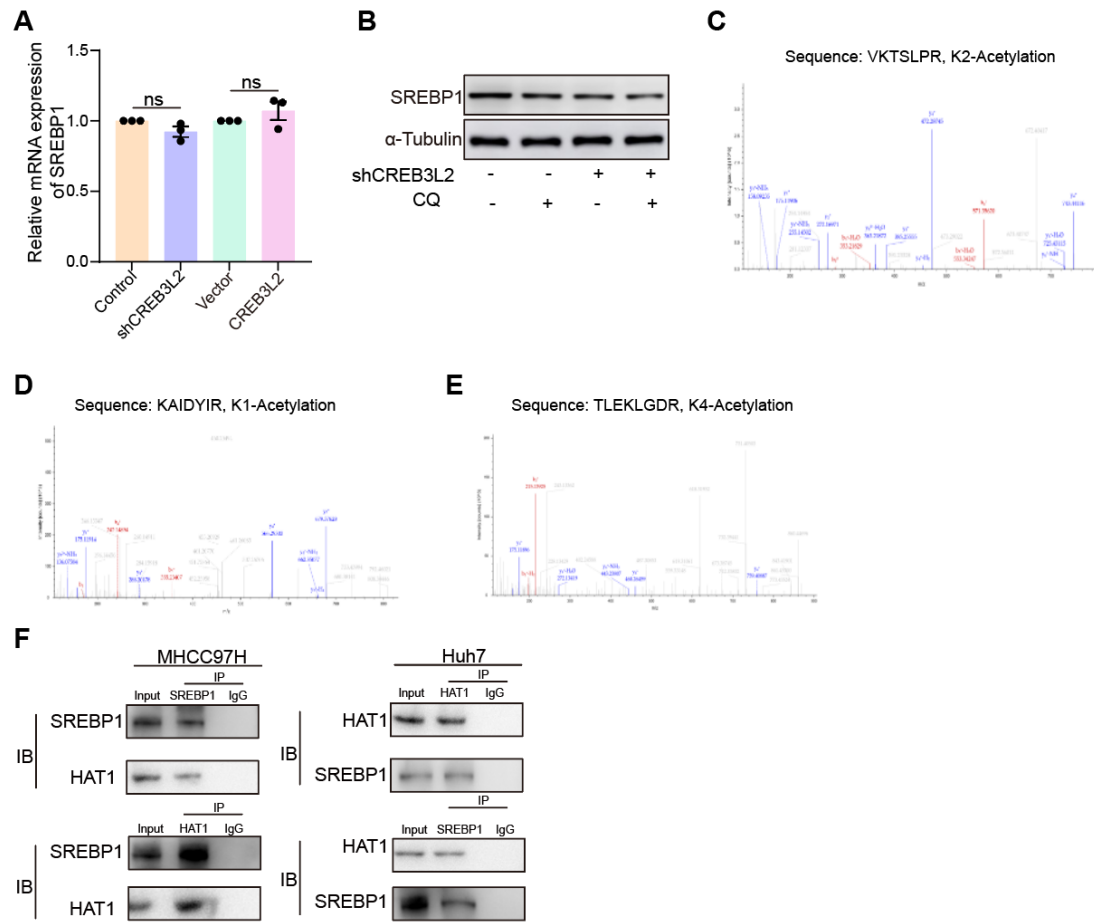

**FigureS3 CREB3L2 attenuates ubiquitinated degradation of SREBP1 protein by enhancing HAT1-mediated acetylation**

(A) The effect of CREB3L2 on SREBP1 mRNA levels in HCC cells.(B) The protein expression level of SREBP1 in 97H-shCREB3L2 cells in the presence of CQ. (C-E) Prediction of acetylation sites on SREBP1 through mass spectrometry analysis.(F) Co-IP demonstrated the combination of HAT1 and SREBP1 in Huh7 cells.

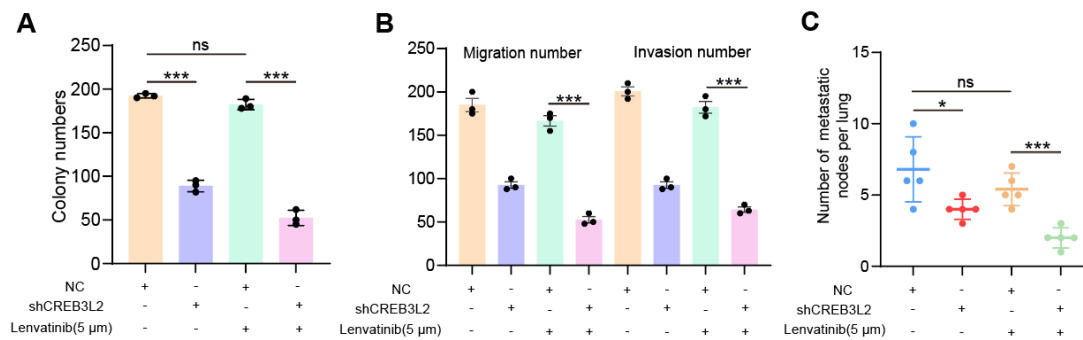

**FigureS4 Targeting CREB3L2 reverses lenvatinib resistance in HCC**

**(A-B)** Inhibition of CREB3L2 expression markedly enhances the effects of lenvatinib on cell proliferation, migration, and invasion. **(C)** The specific differences regarding the metastatic pulmonary nodules among distinct groups.
